# Supplementary material for: Interaction of bacterial genera associated with therapeutic response to immune checkpoint PD-1 blockade in a United States cohort
Source: PubMed Central journal article supplement (PMC8961902; doi:10.1186/s13073-022-01037-7), 2022-03-29

# Figure S5

## A

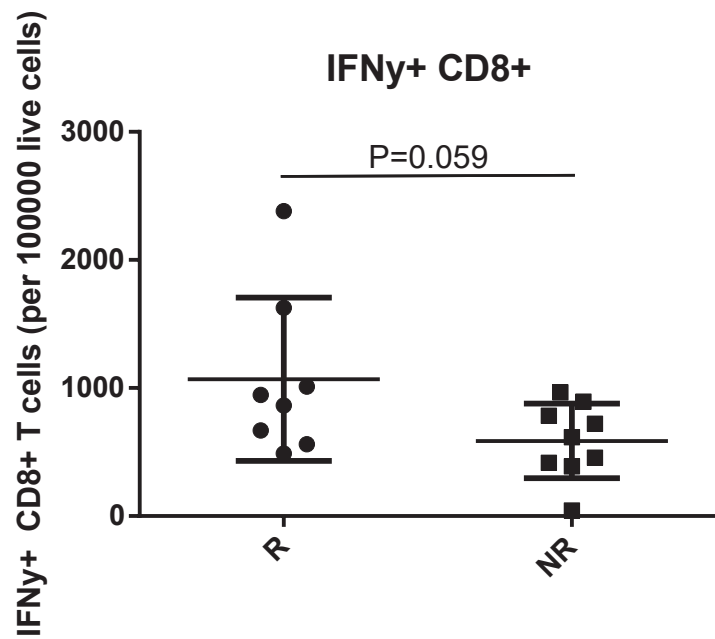

## B

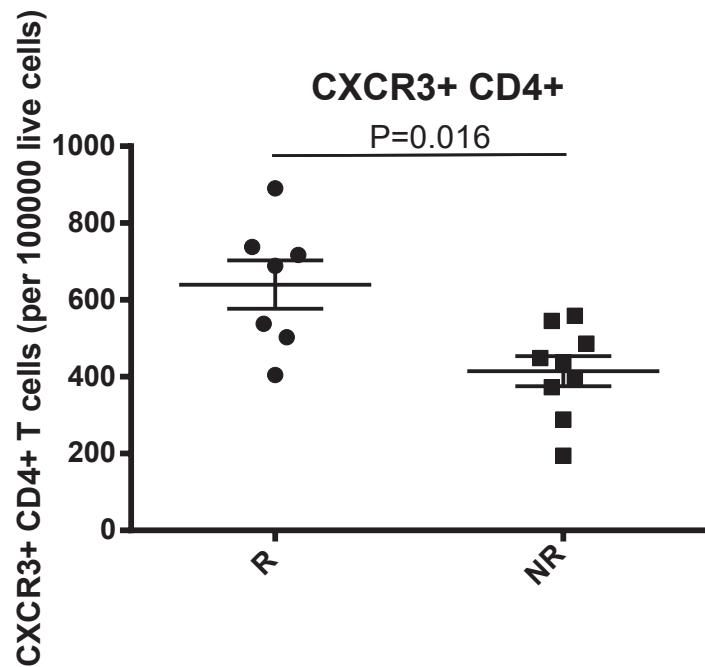

## C

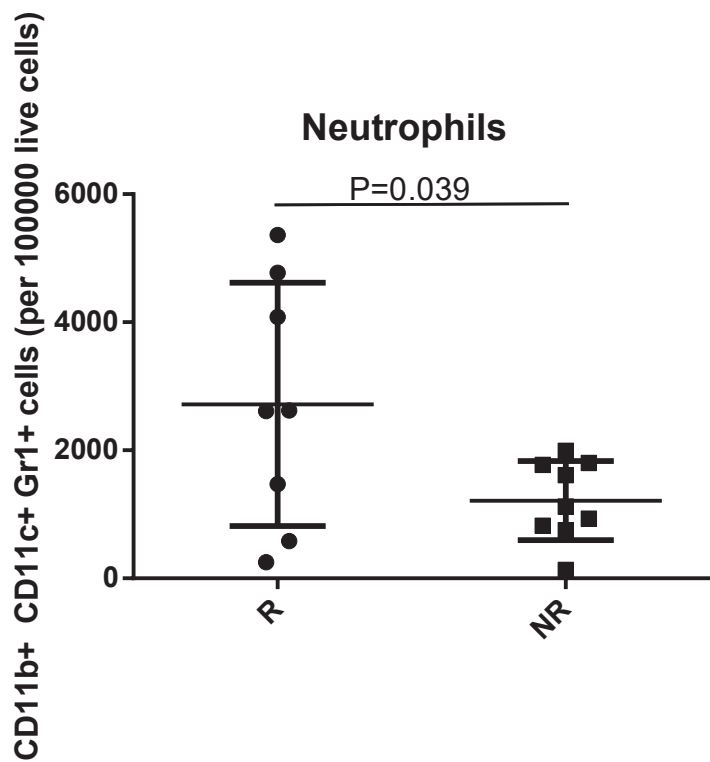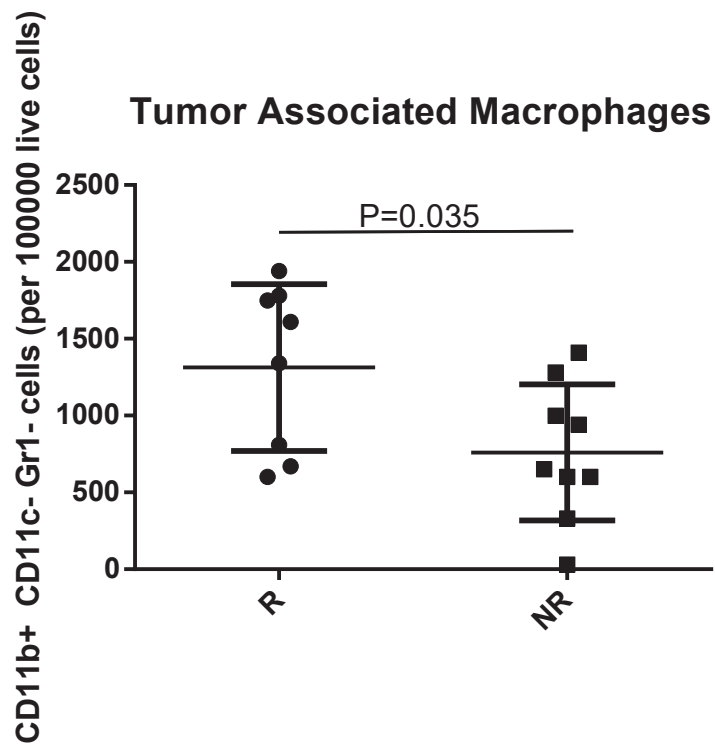

Supplement: 13073_2022_1037_MOESM5_ESM.pdf [file 13073_2022_1037_MOESM5_ESM.pdf]
